# Supplementary material for: Identification of Maize Kernel Vigor under Different Accelerated Aging Times Using Hyperspectral Imaging
Source: MDPI journal article supplement (doi:10.3390/molecules23123078), 2018-11-25
Supplement: s1 [file s1]

## Supplementary file

### Figure captions

**Figure S1** Score images for the first three principal components of Maize 1: (a) Score image for PC1. (b) Score image for PC2. (c) Score image for PC3. The color bar indicates the score value of each pixel, differences of maize kernels under different accelerating aging duration time could be seen according to the score images. Warm color (positive score values) were related to soft endosperm, while cold color (negative score values) were associated with hard endosperm.

**Figure S2** Score images for the first three principal components of Maize 2: (a) Score image for PC1. (b) Score image for PC2. (c) Score image for PC3. The color bar indicates the score value of each pixel, differences of maize kernels under different accelerating aging duration time could be seen according to the score images. Warm color (positive score values) were related to soft endosperm, while cold color (negative score values) were associated with hard endosperm.

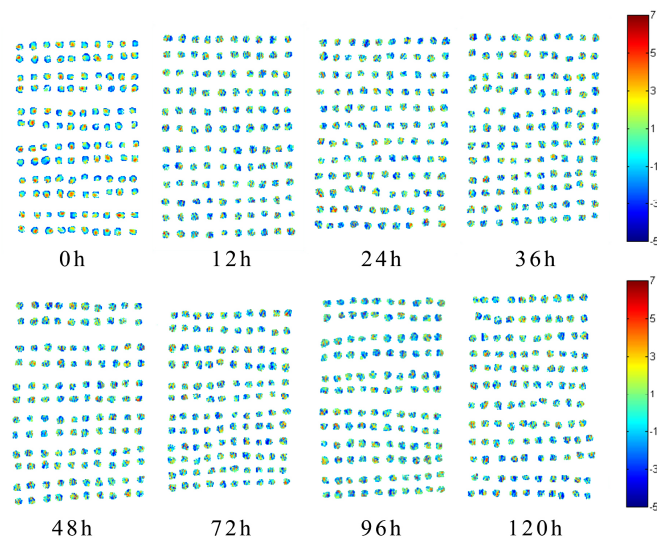

(a)

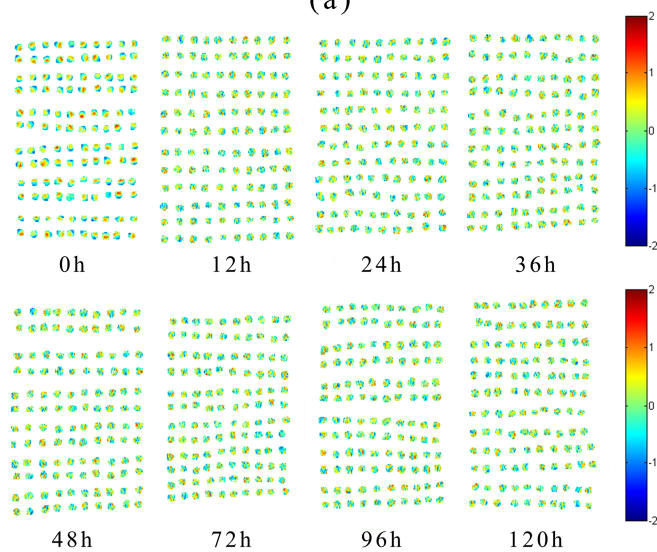

(b)

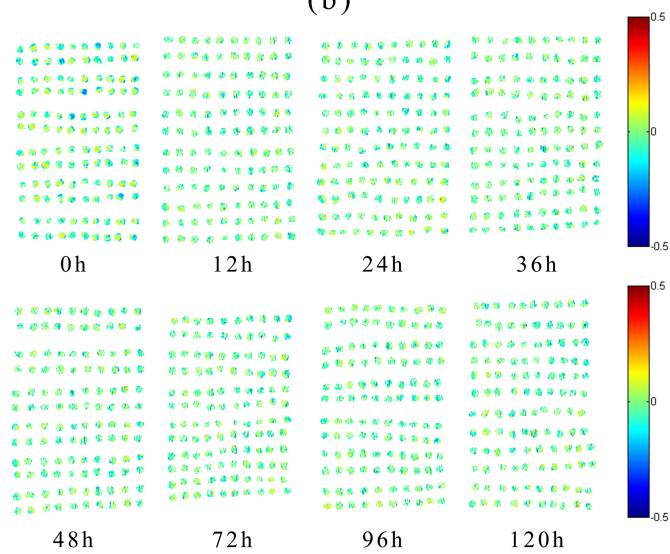

(c)

**Figure S1** Score images for the first three principal components of Maize 1: (a) Score image for PC1. (b) Score image for PC2. (c) Score image for PC3. The color bar indicates the score value of each pixel, differences of maize kernels under different accelerating aging duration time could be seen according to the score images. Warm color (positive score values) were related to soft endosperm, while cold color (negative score values) were associated with hard endosperm.

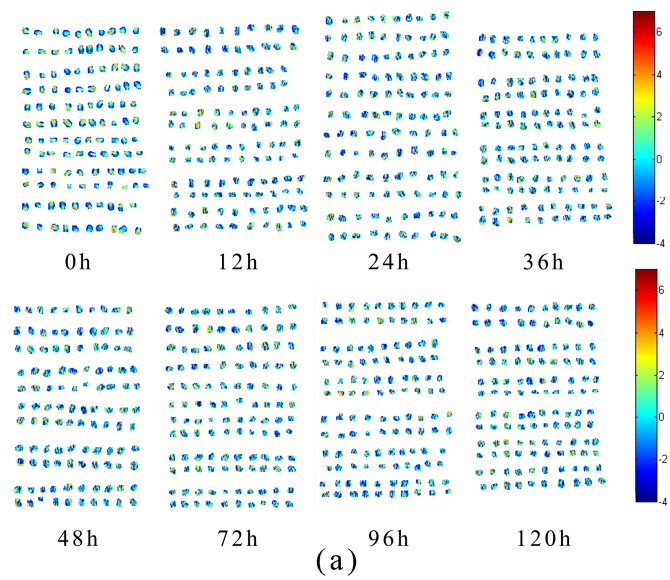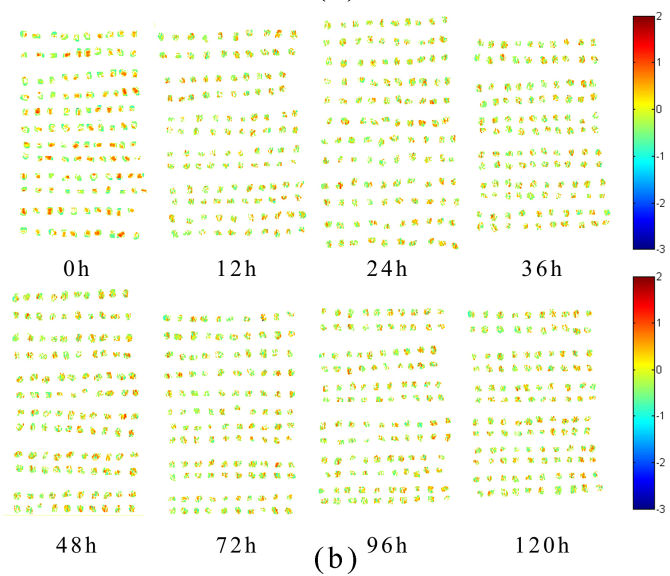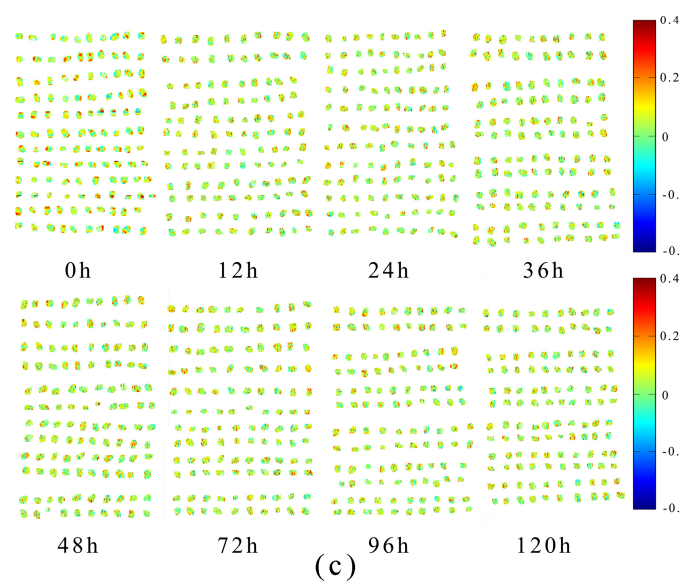

**Figure S2** Score images for the first three principal components of Maize 2: (a) Score image for PC1. (b) Score image for PC2. (c) Score image for PC3. The color bar indicates the score value of each pixel, differences of maize kernels under different accelerating aging duration time could be seen according to the score images. Warm color (positive score values) were related to soft endosperm, while cold color (negative score values) were associated with hard endosperm.
